# Supplementary material
Source: MDPI journal article supplement (https://www.mdpi.com/2073-4395/9/8/429)

**Figure S2:** Haplotype blocks showing recombination breakpoints in the linkage maps of the IWG F1 mapping population A77-3 x C20-7. SNP markers are arranged along the X-axis in their respective orders in the linkage maps they belong to. The population is arranged on the Y-axis. Black color indicates missing allele calls.

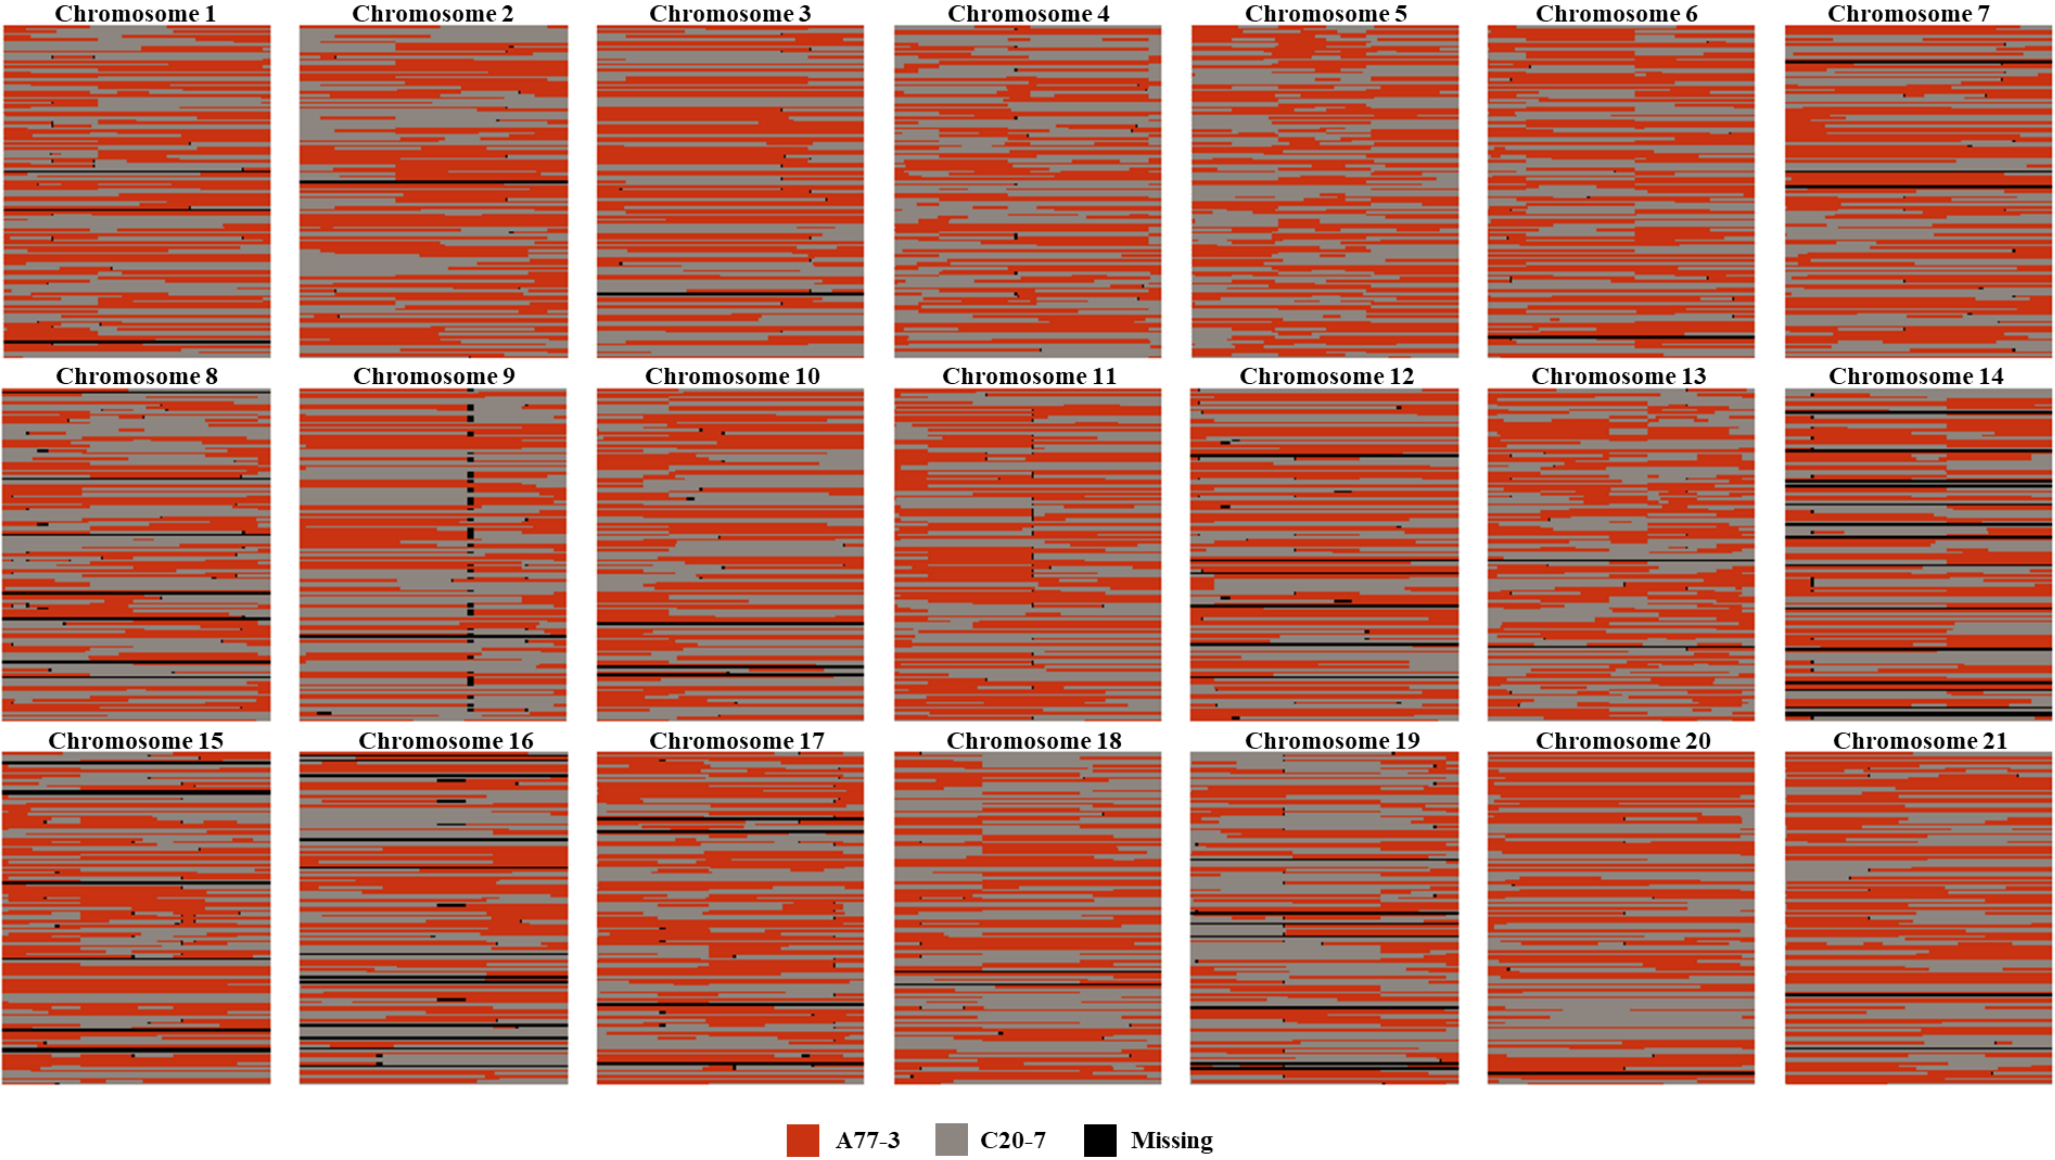

Supplement: s1 [file s1]
