# Supplementary material
Source: MDPI journal article supplement (https://www.mdpi.com/2073-4395/9/8/429)

**Figure S1:** Distribution of field FHB data observed in the UMN\_C3 breeding population in St Paul, MN during 2017 and 2018. Coefficient of infection of 0 indicates immunity and 1 indicates complete susceptibility.

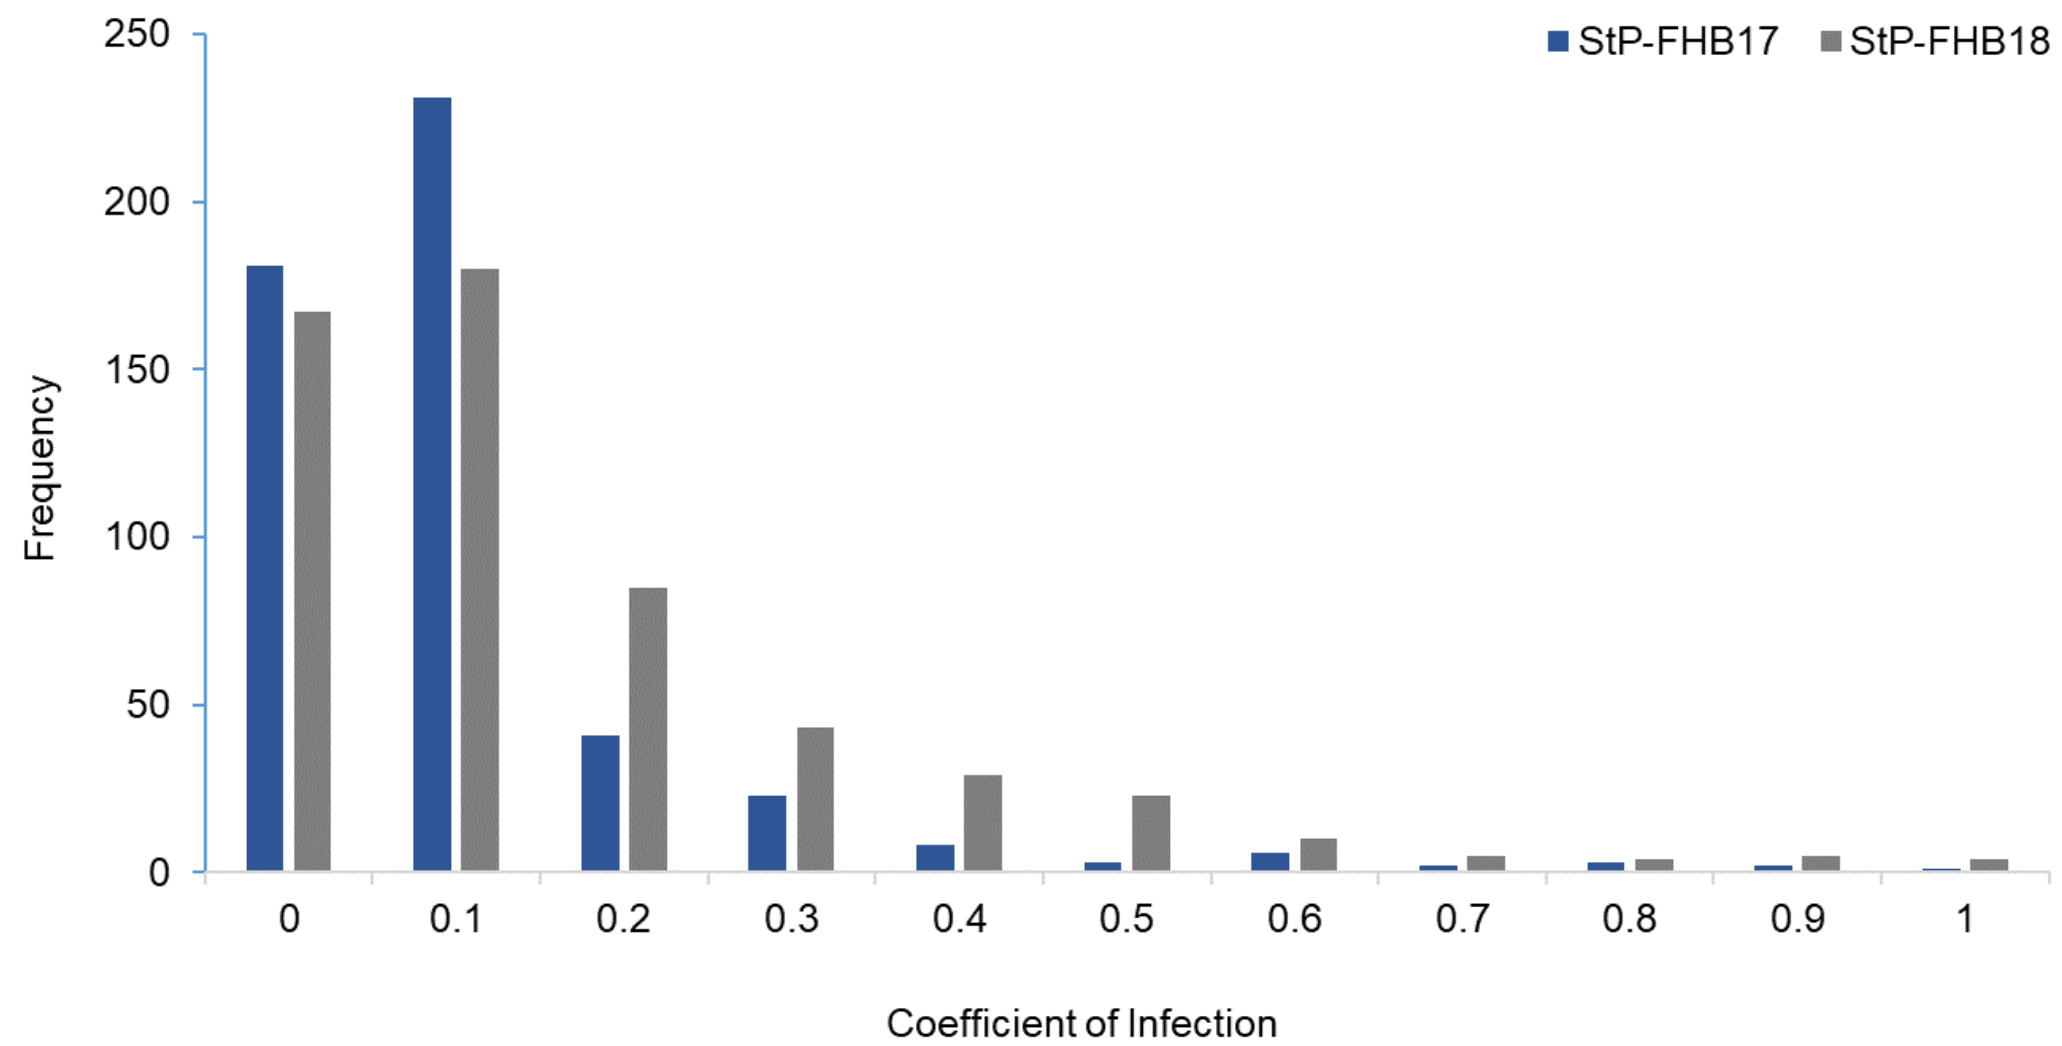

Supplement: s1 [file s1]
